# Supplementary material
Source: PubMed Central journal article supplement (PMC1559896)
Supplement: rspb20053189s02.pdf [file rspb20053189s02.pdf]

# ELECTRONIC APPENDIX

This is the Electronic Appendix to the article

**Trends in body size across an environmental gradient: a differential response in scavenging and non-scavenging demersal deep-sea fish**

by

M.A. Collins, D. M. Bailey, G. D. Ruxton. & I. G. Priede

*Proc. R. Soc. B* ([doi:10.1098/rspb.2005.3189](https://doi.org/10.1098/rspb.2005.3189))

Electronic appendices are refereed with the text; however, no attempt is made to impose a uniform editorial style on the electronic appendices.

Appendix 1. List of trawl stations in the Porcupine Seabight and Porcupine Abyssal Plain from which fish were sampled.

| Cruise         | Station | Date      | Latitude    | Longitude   | Depth (m) | Fish Count |
|----------------|---------|-----------|-------------|-------------|-----------|------------|
| Challenger 134 | 4       | 8/9/1997  | 50° 10' N   | 14° 35' W   | 3965-3965 | 106        |
| Challenger 134 | 6       | 8/9/1997  | 49° 50' N   | 14° 18' W   | 4143-4143 | 43         |
| Challenger 134 | 8       | 8/11/1997 | 50° 2' N    | 12° 48.5' W | 2441-2441 | 220        |
| Challenger 134 | 11      | 8/12/1997 | 50° 2.1' N  | 13° 2.9' W  | 2567-2567 | 85         |
| Challenger 134 | 15      | 8/14/1997 | 49° 33' N   | 11° 36' W   | 747-747   | 111        |
| Challenger 134 | 16      | 8/14/1997 | 49° 38' N   | 11° 49' W   | 985-985   | 69         |
| Challenger 134 | 17      | 8/14/1997 | 49° 37.5' N | 12° 2.5' W  | 1188-1188 | 79         |
| Challenger 134 | 21      | 8/16/1997 | 49° 32.5' N | 12° 48.5' W | 1540-1540 | 260        |
| Challenger 134 | 24      | 8/16/1997 | 49° 57.8' N | 14° 28.9' W | 4139-4139 | 121        |
| Discovery 250  | 13906   | 9/18/2000 | 50° 11.9' N | 14° 39.6' W | 3986-4016 | 152        |
| Discovery 250  | 13910   | 9/21/2000 | 49° 50.6' N | 12° 56.8' W | 2456-2467 | 135        |
| Discovery 250  | 13914   | 9/22/2000 | 49° 54.8' N | 13° 34.3' W | 2981-3115 | 141        |
| Discovery 250  | 13916   | 9/24/2000 | 49° 36.3' N | 13° 32.2' W | 2023-2093 | 99         |
| Discovery 250  | 13919   | 9/25/2000 | 51 8.9' N   | 12° 3.9' W  | 1537-1545 | 532        |
| Discovery 250  | 13922   | 10/1/2000 | 50° 53.9' N | 11° 58.4' W | 1885-1933 | 162        |
| Discovery 250  | 13925   | 10/7/2000 | 48 53.5' N  | 16° 45.9' W | 4835-4845 | 18         |
| Discovery 252  | 13928   | 4/15/2001 | 49° 30' N   | 12° 55.2' W | 1500-1500 | 80         |
| Discovery 252  | 13932   | 4/16/2001 | 49° 51.2' N | 12° 52.5' W | 2398-2470 | 87         |
| Discovery 252  | 13935   | 4/17/2001 | 49° 49.6' N | 13° 8.5' W  | 2400-2500 | 90         |
| Discovery 252  | 13942   | 4/19/2001 | 50° 3.9' N  | 14° 40' W   | 4011-4029 | 126        |
| Discovery 252  | 13945   | 4/20/2001 | 50° 12.0' N | 14° 10.1' W | 3560-3718 | 78         |
| Discovery 252  | 13951   | 4/22/2001 | 49° 49.9' N | 12° 10.8' W | 1631-1653 | 258        |
| Discovery 252  | 13952   | 4/23/2001 | 49° 43' N   | 11° 46.1' W | 1053-1077 | 99         |
| Discovery 252  | 13960   | 4/25/2001 | 49° 54.1' N | 12° 20.9' W | 2274-2300 | 153        |
| Discovery 252  | 13963   | 4/27/2001 | 49° 49' N   | 11° 51.8' W | 1175-1250 | 330        |
| Discovery 252  | 13964   | 4/27/2001 | 49° 33' N   | 11° 33.7' W | 772-845   | 39         |
| Discovery 255  | 14132   | 8/16/2001 | 49° 17' N   | 12° 22.2' W | 1131-1156 | 202        |
| Discovery 255  | 14137   | 8/19/2001 | 49° 36.9' N | 14° 4.6' W  | 4108-4146 | 53         |
| Discovery 255  | 14141   | 8/20/2001 | 49° 59.3' N | 12° 53.4' W | 2494-2514 | 227        |
| Discovery 255  | 14143   | 8/21/2001 | 49° 45.7' N | 12° 53.5' W | 2275-2308 | 134        |
| Discovery 255  | 14146   | 8/22/2001 | 49° 35.2' N | 12° 52.2' W | 1625-1672 | 31         |
| Discovery 255  | 14147   | 8/23/2001 | 49° 31.9' N | 12° 50.7' W | 1515-1523 | 150        |
| Discovery 255  | 14151   | 8/24/2001 | 49° 41.9' N | 13° 11.8' W | 1915-1976 | 104        |
| Discovery 255  | 14156   | 8/27/2001 | 49° 52.1' N | 13° 34.1' W | 3089-3186 | 69         |
| Discovery 255  | 14158   | 8/28/2001 | 49° 32.2' N | 14° 23.3' W | 4286-4311 | 31         |
| Discovery 255  | 14163   | 8/29/2001 | 49° 26.7' N | 12° 41.5' W | 1340-1397 | 72         |
| Discovery 255  | 14164   | 8/30/2001 | 49° 44.3' N | 11° 43.1' W | 1022-1084 | 259        |
| Discovery 255  | 14165   | 8/31/2001 | 51° 26.2' N | 12° 26.0' W | 1414-1509 | 243        |
| Discovery 255  | 14168   | 9/1/2001  | 51° 27.6' N | 12° 29.1' W | 1498-1544 | 25         |
| Discovery 255  | 14170   | 9/1/2001  | 51° 36.4' N | 11° 53.3' W | 775-842   | 161        |
| Discovery 260  | 14302   | 3/11/2002 | 49° 57.8' N | 12° 42.8' W | 2365-2456 | 240        |
| Discovery 260  | 14309   | 3/16/2002 | 49° 43.2' N | 13° 10.4' W | 2011-2218 | 108        |
| Discovery 260  | 14315   | 3/18/2002 | 49° 56.6' N | 13° 30.9' W | 3030-3168 | 119        |

|               |          |            |             |             |           |      |
|---------------|----------|------------|-------------|-------------|-----------|------|
| Discovery 260 | 14317    | 3/19/2002  | 49° 39.4' N | 14° 15.5' W | 4190-4263 | 26   |
| Discovery 260 | 14319    | 3/20/2002  | 49° 52.4' N | 13° 01' W   | 2555-2590 | 71   |
| Discovery 260 | 14322    | 3/21/2002  | 49° 49.5' N | 12° 32.3' W | 2177-2230 | 38   |
| Discovery 260 | 14323    | 3/21/2002  | 49° 36.6' N | 12° 11.8' W | 1419-1440 | 233  |
| Discovery 260 | 14325    | 3/22/2002  | 49° 40.3' N | 11° 55.7' W | 1100-1119 | 167  |
| Discovery 266 | 15048    | 9/30/2002  | 51° 15.3' N | 11° 54.8' W | 1200-1200 | 1226 |
| Discovery 266 | 15051    | 10/1/2002  | 51° 26.9' N | 11° 54.3' W | 1000-1000 | 330  |
| Discovery 266 | 15052    | 10/1/2002  | 50° 4.8' N  | 12° 45.7' W | 2500-2500 | 268  |
| Discovery 266 | 15054#22 | 10/9/2002  | 48° 43.1' N | 16° 33.8' W | 4809-4814 | 10   |
| Discovery 266 | 15054#24 | 10/10/2002 | 48° 40' N   | 16° 42.5' W | 4809-4814 | 4    |
| Discovery 266 | 15054#25 | 10/11/2002 | 48° 55' N   | 16° 5.7' W  | 4809-4812 | 6    |
| Discovery 266 | 15054#6  | 10/3/2002  | 48° 57.4' N | 16° 17.7' W | 4810-4810 | 11   |
| Discovery 266 | 15054#8  | 10/4/2002  | 48° 53.8' N | 16° 10.8' W | 4808-4808 | 4    |
| Discovery 266 | 15055#2  | 10/12/2002 | 49° 25.8' N | 15° 25.5' W | 4749-4780 | 9    |
| Discovery 266 | 15058    | 10/14/2002 | 49° 40.6' N | 13° 1.6' W  | 1992-2040 | 136  |
| Discovery 266 | 15062    | 10/15/2002 | 49° 48.9' N | 13° 42.9' W | 3071-3181 | 54   |
| Discovery 266 | 15063    | 10/18/2002 | 49° 40' N   | 11° 30.7' W | 785-920   | 177  |
| Discovery 266 | 15066    | 10/19/2002 | 49° 50.4' N | 12° 5.1' W  | 1240-1360 | 185  |
